# Supplementary material
Source: PubMed Central journal article supplement (PMC4355017)
Supplement: NIHMS648334-supplement-Supplementary_Table_1.pdf [file NIHMS648334-supplement-Supplementary_Table_1.pdf]

| Supplementary Table 1   Cancer gene mutation frequencies |                     |                   |                         |                   |                          |                   |                               |                   |
|----------------------------------------------------------|---------------------|-------------------|-------------------------|-------------------|--------------------------|-------------------|-------------------------------|-------------------|
| Gene                                                     | COSMIC <sup>a</sup> |                   | cBioPortal <sup>b</sup> |                   | TumorPortal <sup>c</sup> |                   | ICGC Data Portal <sup>d</sup> |                   |
|                                                          | %                   | Mutations/Samples | %                       | Mutations/Samples | %                        | Mutations/Samples | %                             | Mutations/Samples |
| <i>TP53</i>                                              | 29.0                | 25,071/86,305     | 26.8                    | 4,714/17,584      | 39.1                     | 1,852/4,742       | 30.7                          | 2,020/6,590       |
| <i>PIK3CA</i>                                            | 11.7                | 7,214/61,468      | 9.9                     | 1750/17,584       | 16.2                     | 766/4,742         | 14.2                          | 889/6263          |
| <i>BRAF</i>                                              | 19.5                | 36,590/187,951    | 4.8                     | 850/17,584        | 4.2                      | 198/4,742         | 11.6                          | 726/6233          |
| <i>KRAS</i>                                              | 21.1                | 30,067/142,526    | 5.7                     | 1,007/17,584      | 7.3                      | 348/4,742         | 10.2                          | 645/6,590         |
| <i>HRAS</i>                                              | 3.1                 | 1,164/37,707      | 0.7                     | 117/17,584        | 0.7                      | 34/4,742          | 1.9                           | 83/4440           |
| <i>NRAS</i>                                              | 5.6                 | 3,662/65,492      | 2.2                     | 389/17,584        | 2.7                      | 130/4,742         | 4.1                           | 231/5581          |
| <i>All RAS</i>                                           | 29.8                | 34,893 mutations  | 8.6                     |                   | 10.8                     |                   | 16.2                          |                   |

<sup>a</sup>Data from 99,9872 samples, including analyses of 9,424 whole genomes  
<sup>b</sup>Data from 69 cancer genomics studies (17,584 patients)  
<sup>c</sup>Data from 21 cancers (4,742 patients)  
<sup>d</sup>Data from 18 primary sites in 42 cancers (11,633 patients)
