# Supplementary material
Source: PubMed Central journal article supplement (PMC4355017)
Supplement: NIHMS648334-supplement-Supplementary_Table_2.pdf [file NIHMS648334-supplement-Supplementary_Table_2.pdf]

| <b>Supplementary Table 2   RAS mutation frequencies in human cancer</b> |                |                    |             |                    |             |                    |             |                |                    |
|-------------------------------------------------------------------------|----------------|--------------------|-------------|--------------------|-------------|--------------------|-------------|----------------|--------------------|
| <b>Cancer</b>                                                           | <b>Samples</b> | <b>Alterations</b> | <b>KRAS</b> | <b>Alterations</b> | <b>NRAS</b> | <b>Alterations</b> | <b>HRAS</b> | <b>All RAS</b> | <b>Study; Refs</b> |
| Pancreatic ductal adenocarcinoma                                        | 114            | 114                | 100.0       | 0                  | 0.0         | 0                  | 0.0         | 100.0          | JHU; 1             |
| Pancreatic ductal adenocarcinoma                                        | 99             | 94                 | 84.5        | 0                  | 0.0         | 0                  | 0.0         | 94.9           | ICGC; 2            |
| Pancreatic ductal adenocarcinoma                                        | 3              | 3                  | 100.0       | 0                  | 0.0         | 0                  | 0.0         | 100.0          | TGen; 3            |
| <b>Total</b>                                                            | <b>216</b>     | <b>211</b>         | <b>97.7</b> | <b>0</b>           | <b>0.0</b>  | <b>0</b>           | <b>0.0</b>  | <b>97.7</b>    |                    |
| Colorectal adenocarcinoma                                               | 11             | 6                  | 54.5        | 0                  | 0.0         | 0                  | 0.0         | 54.5           | JHU; 4             |
| Colorectal adenocarcinoma                                               | 11             | 5                  | 45.5        | 2                  | 18.2        | 0                  | 0.0         | 63.6           | Broad; 5           |
| Colorectal adenocarcinoma                                               | 72             | 37                 | 51.4        | 2                  | 2.8         | 0                  | 0.0         | 54.2           | Genentech; 6       |
| Colorectal adenocarcinoma                                               | 224            | 94*                | 42.0        | 20*                | 8.9         | 0                  | 0.0         | 48.7           | TCGA; 7            |
| <b>Total</b>                                                            | <b>318</b>     | <b>142</b>         | <b>44.7</b> | <b>24</b>          | <b>7.5</b>  | <b>0</b>           | <b>0.0</b>  | <b>52.2</b>    |                    |
| Multiple myeloma                                                        | 67             | 17                 | 25.4        | 17                 | 25.4        | 0                  | 0.0         | 50.7           | CGP; 8             |
| Multiple myeloma                                                        | 205            | 45*                | 22.0        | 37*                | 18.0        | 0                  | 0.0         | 39.0           | Broad;9            |
| <b>Total</b>                                                            | <b>272</b>     | <b>62</b>          | <b>22.8</b> | <b>54</b>          | <b>19.9</b> | <b>0</b>           | <b>0.0</b>  | <b>42.6</b>    |                    |
| Lung adenocarcinoma                                                     | 57             | 13                 | 22.8        | 1                  | 1.8         | 0                  | 0.0         | 24.6           | Genentech; 10      |
| Lung adenocarcinoma                                                     | 163            | 60                 | 36.8        | 3                  | 1.8         | 0                  | 0.0         | 38.7           | TSP; 11            |
| Lung adenocarcinoma                                                     | 230            | 75                 | 32.6        | 1                  | 0.4         | 1                  | 0.4         | 33.5           | TCGA; in press     |
| Lung adenocarcinoma                                                     | 183            | 49                 | 26.8        | 1                  | 0.5         | 1                  | 0.5         | 27.9           | Broad; 12          |
| <b>Total</b>                                                            | <b>637</b>     | <b>197</b>         | <b>30.9</b> | <b>6</b>           | <b>0.9</b>  | <b>2</b>           | <b>0.3</b>  | <b>32.2</b>    |                    |
| Skin cutaneous melanoma                                                 | 278            | 4                  | 1.4         | 85                 | 30.1        | 3                  | 1.1         | 33.1           | TCGA; provisional  |
| Skin cutaneous melanoma                                                 | 121            | 0                  | 0.0         | 31                 | 25.6        | 1                  | 0.8         | 26.4           | Broad; 13          |
| Skin cutaneous melanoma                                                 | 91             | 0                  | 0.0         | 19                 | 20.9        | 1                  | 1.1         | 22.0           | Yale; 14           |
| <b>Total</b>                                                            | <b>490</b>     | <b>4</b>           | <b>0.8</b>  | <b>135</b>         | <b>27.6</b> | <b>5</b>           | <b>1.0</b>  | <b>29.4</b>    |                    |
| Uterine corpus endometrioid carcinoma                                   | 248            | 53*                | 21.4        | 9*                 | 3.6         | 1                  | 0.4         | 24.6           | TCGA; 15           |
| Uterine carcinosarcoma                                                  | 57             | 7                  | 12.3        | 1                  | 1.8         | 0                  | 0.0         | 14.0           | TCGA; provisional  |
| Thyroid carcinoma                                                       | 401            | 4                  | 1.0         | 34                 | 8.5         | 14                 | 3.5         | 13.0           | TCGA; provisional  |
| Stomach adenocarcinoma                                                  | 220            | 25                 | 11.4        | 2                  | 0.9         | 0                  | 0.0         | 12.3           | TCGA; provisional  |
| Acute myeloid leukemia                                                  | 200            | 8                  | 4.0         | 15                 | 7.5         | 0                  | 0.0         | 11.5           | TCGA; 16           |
| Acute myeloid leukemia                                                  | 55             | 0                  | 0.0         | 2                  | 3.6         | 4                  | 7.3         | 10.9           | ICGC (KR)          |
| <b>Total</b>                                                            | <b>255</b>     | <b>8</b>           | <b>3.1</b>  | <b>17</b>          | <b>6.7</b>  | <b>4</b>           | <b>1.6</b>  | <b>11.4</b>    |                    |
| Bladder urothelial carcinoma                                            | 99             | 7                  | 7.1         | 2                  | 2.0         | 15                 | 15.2        | 24.2           | BGI; 17            |
| Bladder urothelial carcinoma                                            | 130            | 0                  | 0.0         | 2                  | 1.5         | 6                  | 4.6         | 6.2            | TCGA; 18           |
| Bladder urothelial carcinoma                                            | 97             | 4                  | 4.1         | 0                  | 0.0         | 0                  | 0.0         | 4.1            | MSKCC; 19          |
| Bladder cancer                                                          | 15             | 2                  | 13.3        | 0                  | 0.0         | 0                  | 0.0         | 13.0           | 20                 |
| Bladder urothelial carcinoma                                            | 28             | 0                  | 0.0         | 1                  | 3.6         | 0                  | 0.0         | 3.6            | TCGA; provisional  |
| <b>Total</b>                                                            | <b>369</b>     | <b>13</b>          | <b>3.5</b>  | <b>5</b>           | <b>1.4</b>  | <b>21</b>          | <b>5.9</b>  | <b>10.6</b>    |                    |
| Cervical adenocarcinoma                                                 | 24             | 2                  | 8.3         | 0                  | 0.0         | 0                  | 0.0         | 8.3            | Broad;21           |
| Head and neck squamous cell carcinoma                                   | 32             | 0                  | 0.0         | 0                  | 0.0         | 3                  | 9.4         | 9.4            | JHU; 22            |
| Head and neck squamous cell carcinoma                                   | 74             | 1                  | 1.4         | 0                  | 0.0         | 4                  | 5.4         | 6.8            | Broad; 23          |
| Head and neck squamous cell carcinoma                                   | 279            | 1                  | 0.4         | 1                  | 0.4         | 11                 | 3.9         | 4.7            | TCGA; in revision  |
| <b>Total</b>                                                            | <b>385</b>     | <b>2</b>           | <b>0.5</b>  | <b>1</b>           | <b>0.3</b>  | <b>18</b>          | <b>4.7</b>  | <b>5.5</b>     |                    |
| Diffuse large B-cell lymphoma                                           | 58             | 3                  | 0.0         | 0                  | 0.0         | 0                  | 0.0         | 5.2            | Broad; 24          |
| Gastric carcinoma                                                       | 100            | 4                  | 4.0         | 1                  | 1.0         | 0                  | 0.0         | 5.0            | 25                 |
| Esophageal adenocarcinoma                                               | 146            | 6                  | 4.1         | 0                  | 0.0         | 1                  | 0.7         | 4.8            | Broad; 26          |
| Chronic lymphocytic leukaemia                                           | 160            | 3                  | 1.9         | 4                  | 2.5         | 0                  | 0.0         | 4.4            | Broad; 27          |

|                                             |       |   |     |   |     |   |     |     |                   |
|---------------------------------------------|-------|---|-----|---|-----|---|-----|-----|-------------------|
| Lung squamous cell carcinoma                | 63    | 3 | 4.8 | 0 | 0.0 | 0 | 0.0 | 4.8 | Genentech; 10     |
| Lung squamous cell carcinoma                | 178   | 2 | 1.1 | 0 | 0.0 | 5 | 2.8 | 3.9 | TCGA; 28          |
| Total                                       | 226   | 5 | 2.2 | 0 | 0.0 | 5 | 2.2 | 4.4 |                   |
| Small cell lung carcinoma                   | 29    | 1 | 3.4 | 0 | 0.0 | 0 | 0.0 | 3.4 | CLCGP; 29         |
| Small cell lung carcinoma                   | 42    | 0 | 0.0 | 0 | 0.0 | 1 | 2.4 | 2.4 | JHU; 30           |
| Total                                       | 71    | 1 | 1.4 | 0 | 0.0 | 1 | 1.4 | 2.8 |                   |
| Renal papillary cell carcinoma              | 168   | 2 | 1.2 | 1 | 0.6 | 1 | 0.6 | 2.4 | TCGA; provisional |
| Adenoid cystic carcinoma                    | 60    | 0 | 0.0 | 0 | 0.0 | 1 | 1.7 | 1.7 | MSKCC; 31         |
| Medulloblastoma & pilocytic astrocytoma     | 193   | 2 | 1.0 | 1 | 0.5 | 0 | 0.0 | 1.6 | ICGC (DE)         |
| Chromophobe renal cell carcinoma            | 66    | 0 | 0.0 | 1 | 1.5 | 0 | 0.0 | 1.5 | TCGA; provisional |
| Hepatocellular carcinoma                    | 231   | 2 | 0.9 | 1 | 0.4 | 0 | 0.0 | 1.3 | AMC; 32           |
| Hepatocellular carcinoma                    | 27    | 0 | 0.0 | 0 | 0.0 | 0 | 0.0 | 0.0 | RIKEN; 33         |
| Hepatocellular carcinoma                    | 88    | 0 | 0.0 | 2 | 2.3 | 0 | 0.0 | 2.3 | 34                |
| Total                                       | 346   | 2 | 0.6 | 3 | 0.9 | 0 | 0.0 | 1.4 |                   |
| Breast invasive carcinoma (TNBC)            | 65    | 0 | 0.0 | 2 | 3.1 | 0 | 0.0 | 3.1 | BC; 35            |
| Breast invasive carcinoma (79 ER+/21 ER-)   | 100   | 1 | 1.0 | 0 | 0.0 | 1 | 1.0 | 2.0 | Sanger; 36        |
| Breast cancer (primary, all major subtypes) | 103   | 0 | 0.0 | 0 | 0.0 | 0 | 0.0 | 0.0 | Broad; 37         |
| Breast triple negative/lobular cancer       | 117   | 4 | 3.4 | 3 | 2.6 | 3 | 2.6 | 7.7 | ICGC (UK)         |
| Breast invasive carcinoma                   | 825   | 3 | 3.6 | 0 | 0.0 | 0 | 0.0 | 3.6 | TCGA; 38          |
| Total                                       | 1,210 | 8 | 0.7 | 5 | 0.4 | 4 | 0.3 | 1.4 |                   |
| Ovarian serous adenocarcinoma               | 316   | 2 | 0.6 | 2 | 0.6 | 0 | 0.0 | 1.3 | TCGA; 39          |
| Cervical squamous cell carcinoma            | 79    | 1 | 1.3 | 0 | 0.0 | 0 | 0.0 | 1.3 | Broad; 21         |
| Adrenocortical carcinoma                    | 91    | 0 | 0.0 | 1 | 1.1 | 0 | 0.0 | 1.1 | TCGA; provisional |
| Prostate adenocarcinoma                     | 61    | 1 | 1.6 | 0 | 0.0 | 0 | 0.0 | 1.6 | Michigan; 40      |
| Prostate adenocarcinoma                     | 103   | 1 | 1.0 | 0 | 0.0 | 0 | 0.0 | 1.0 | MSKCC; 41         |
| Prostate adenocarcinoma                     | 112   | 0 | 0.0 | 0 | 0.0 | 1 | 0.9 | 0.9 | Broad/Cornell; 42 |
| Prostate adenocarcinoma                     | 57    | 0 | 0.0 | 0 | 0.0 | 0 | 0.0 | 0.0 | Broad/Cornell; 43 |
| Prostate adenocarcinoma                     | 261   | 0 | 0.0 | 0 | 0.0 | 2 | 0.8 | 0.8 | TCGA; provisional |
| Total                                       | 594   | 2 | 0.3 | 0 | 0.0 | 3 | 0.5 | 0.8 |                   |
| Neuroblastoma                               | 240   | 0 | 0.0 | 2 | 0.8 | 0 | 0.0 | 0.8 | Broad/GSC; 44     |
| Glioblastoma multiforme                     | 291   | 2 | 0.7 | 0 | 0.0 | 0 | 0.0 | 0.7 | TCGA; 45          |
| Brain lower grade glioma                    | 289   | 1 | 0.3 | 1 | 0.3 | 0 | 0.0 | 0.7 | TCGA; provisional |
| Medulloblastoma                             | 125   | 0 | 0.0 | 1 | 0.8 | 0 | 0.0 | 0.8 | ICGC; 46          |
| Medulloblastoma                             | 37    | 0 | 0.0 | 0 | 0.0 | 0 | 0.0 | 0.0 | PCGP; 47          |
| Medulloblastoma                             | 92    | 0 | 0.0 | 0 | 0.0 | 0 | 0.0 | 0.0 | Broad; 48         |
| Total                                       | 254   | 0 | 0.0 | 1 | 0.8 | 0 | 0.0 | 0.4 |                   |
| Renal clear cell carcinoma                  | 14    | 0 | 0.0 | 0 | 0.0 | 0 | 0.0 | 0.0 | CGP; 49           |
| Renal clear cell carcinoma                  | 98    | 0 | 0.0 | 0 | 0.0 | 0 | 0.0 | 0.0 | BGI; 50           |
| Renal clear cell carcinoma                  | 424   | 1 | 0.2 | 0 | 0.0 | 1 | 0.2 | 0.4 | TCGA; 51          |
| Total                                       | 536   | 1 | 0.2 | 0 | 0.0 | 1 | 0.2 | 0.4 |                   |
|                                             |       |   |     |   |     |   |     |     |                   |
|                                             |       |   |     |   |     |   |     |     |                   |
|                                             |       |   |     |   |     |   |     |     |                   |
| Esophageal adenocarcinoma                   | 11    | 0 | 0.0 | 0 | 0.0 | 0 | 0.0 | 0.0 | JHU; 52           |
| Esophageal squamous cell carcinoma          | 12    | 0 | 0.0 | 0 | 0.0 | 0 | 0.0 | 0.0 | JHU; 52           |
| Esophageal squamous cell carcinoma          | 158   | 0 | 0.0 | 0 | 0.0 | 0 | 0.0 | 0.0 | 53                |
| Esophageal squamous cell carcinoma          | 139   | 0 | 0.0 | 0 | 0.0 | 0 | 0.0 | 0.0 | 54                |

|                                       |     |   |     |   |     |   |     |     |                 |
|---------------------------------------|-----|---|-----|---|-----|---|-----|-----|-----------------|
| Total                                 | 309 | 0 | 0.0 | 0 | 0.0 | 0 | 0.0 | 0.0 | 0.0             |
| Osteosarcoma (paediatric)             | 20  | 0 | 0.0 | 0 | 0.0 | 0 | 0.0 | 0.0 | 55              |
| Ovarian small cell carcinoma          | 12  | 0 | 0.0 | 0 | 0.0 | 0 | 0.0 | 0.0 | TGen; 56        |
| Ovarian small cell carcinoma          | 2   | 0 | 0.0 | 0 | 0.0 | 0 | 0.0 | 0.0 | McGill; 57      |
| Ovarian small cell carcinoma          | 12  | 0 | 0.0 | 0 | 0.0 | 0 | 0.0 | 0.0 | MSKCC; 58       |
| Total                                 | 26  | 0 | 0.0 | 0 | 0.0 | 0 | 0.0 | 0.0 |                 |
| Rhabdoid tumors                       | 35  | 0 | 0.0 | 0 | 0.0 | 0 | 0.0 | 0.0 | Broad; 59       |
| Sarcoma                               | 207 | 0 | 0.0 | 0 | 0.0 | 0 | 0.0 | 0.0 | MSKCC/Broad; 60 |
| Small intestine neuroendocrine tumors | 55  | 0 | 0.0 | 0 | 0.0 | 0 | 0.0 | 0.0 | Broad; 61       |
| T-cell prolymphocytic leukemia        | 40  | 0 | 0.0 | 0 | 0.0 | 0 | 0.0 | 0.0 | 62              |

AMC, Asan Medical Center; BC, British Columbia; BGI, Beijing Genomics Institute, Broad, <http://cancergenome.broadinstitute.org>; CGP, Cancer Genomics Project (Tokyo); CLCGP; Clinical Lung Cancer Genome Project; GSC, Genome Sciences Centre (BC Cancer Agency); ICGC, International Cancer Genome Consortium (AU, Australia; CA, Canada; DE, Germany; KR, South Korea; UK, United Kingdom); JHU; Johns Hopkins University; METABRIC, Molecular Taxonomy of Breast Cancer International Consortium; MSKCC; Memorial Sloan Kettering Cancer Center; PCGP, Pediatric Cancer Genome Project; TCGA, The Cancer Genome Atlas, <https://tcga-data.nci.nih.gov/tcga/>; TSP, Tumor Sequencing Project; \*Some KRAS and NRAS mutations were found in the same patients. Data were also compiled from <http://www.cbioportal.org/public-portal/>

## References

- Jones, S. et al. Core signaling pathways in human pancreatic cancers revealed by global genomic analyses. *Science* **321**, 1801-6 (2008).
- Biankin, A.V. et al. Pancreatic cancer genomes reveal aberrations in axon guidance pathway genes. *Nature* **491**, 399-405 (2012).
- Liang, W.S. et al. Genome-wide characterization of pancreatic adenocarcinoma patients using next generation sequencing. *PLoS one* **7**, e43192 (2012).
- Wood, L.D. et al. The genomic landscapes of human breast and colorectal cancers. *Science* **318**, 1108-13 (2007).
- Bass, A.J. et al. Genomic sequencing of colorectal adenocarcinomas identifies a recurrent VTI1A-TCF7L2 fusion. *Nat Genet* **43**, 964-8 (2011).
- Seshagiri, S. et al. Recurrent R-spondin fusions in colon cancer. *Nature* **488**, 660-4 (2012).
- Comprehensive molecular characterization of human colon and rectal cancer. *Nature* **487**, 330-7 (2012).
- Bolli, N. et al. Heterogeneity of genomic evolution and mutational profiles in multiple myeloma. *Nat Commun* **5**, 2997 (2014).
- Lohr, J.G. et al. Widespread genetic heterogeneity in multiple myeloma: implications for targeted therapy. *Cancer Cell* **25**, 91-101 (2014).
- Kan, Z. et al. Diverse somatic mutation patterns and pathway alterations in human cancers. *Nature* **466**, 869-73 (2010).
- Ding, L. et al. Somatic mutations affect key pathways in lung adenocarcinoma. *Nature* **455**, 1069-75 (2008).
- Imielinski, M. et al. Mapping the hallmarks of lung adenocarcinoma with massively parallel sequencing. *Cell* **150**, 1107-20 (2012).
- Hodis, E. et al. A landscape of driver mutations in melanoma. *Cell* **150**, 251-63 (2012).
- Krauthammer, M. et al. Exome sequencing identifies recurrent somatic RAC1 mutations in melanoma. *Nat Genet* **44**, 1006-14 (2012).
- Kandoth, C. et al. Integrated genomic characterization of endometrial carcinoma. *Nature* **497**, 67-73 (2013).
- Genomic and epigenomic landscapes of adult de novo acute myeloid leukemia. *New Engl J Med* **368**, 2059-74 (2013).
- Guo, G. et al. Whole-genome and whole-exome sequencing of bladder cancer identifies frequent alterations in genes involved in sister chromatid cohesion and segregation. *Nat Genet* **45**, 1459-63 (2013).
- Comprehensive molecular characterization of urothelial bladder carcinoma. *Nature* (2014).

19. Iyer, G. et al. Prevalence and co-occurrence of actionable genomic alterations in high-grade bladder cancer. *J Clin Oncol* **31**, 3133-40 (2013).
20. Cazier, J.B. et al. Whole-genome sequencing of bladder cancers reveals somatic CDKN1A mutations and clinicopathological associations with mutation burden. *Nat Commun* **5**, 3756 (2014).
21. Ojesina, A.I. et al. Landscape of genomic alterations in cervical carcinomas. *Nature* **506**, 371-5 (2014).
22. Agrawal, N. et al. Exome sequencing of head and neck squamous cell carcinoma reveals inactivating mutations in NOTCH1. *Science* **333**, 1154-7 (2011).
23. Stransky, N. et al. The mutational landscape of head and neck squamous cell carcinoma. *Science* **333**, 1157-60 (2011).
24. Lohr, J.G. et al. Discovery and prioritization of somatic mutations in diffuse large B-cell lymphoma (DLBCL) by whole-exome sequencing. *Proc Natl Acad Sci USA* **109**, 3879-84 (2012).
25. Wang, K. et al. Whole-genome sequencing and comprehensive molecular profiling identify new driver mutations in gastric cancer. *Nat Genet* **46**, 573-82 (2014).
26. Dulak, A.M. et al. Exome and whole-genome sequencing of esophageal adenocarcinoma identifies recurrent driver events and mutational complexity. *Nat Genet* **45**, 478-86 (2013).
27. Landau, D.A. et al. Evolution and impact of subclonal mutations in chronic lymphocytic leukemia. *Cell* **152**, 714-26 (2013).
28. Comprehensive genomic characterization of squamous cell lung cancers. *Nature* **489**, 519-25 (2012).
29. Peifer, M. et al. Integrative genome analyses identify key somatic driver mutations of small-cell lung cancer. *Nat Genet* **44**, 1104-10 (2012).
30. Rudin, C.M. et al. Comprehensive genomic analysis identifies SOX2 as a frequently amplified gene in small-cell lung cancer. *Nat Genet* **44**, 1111-6 (2012).
31. Ho, A.S. et al. The mutational landscape of adenoid cystic carcinoma. *Nat Genetics* **45**, 791-8 (2013).
32. Ahn, S.M. et al. A genomic portrait of resectable hepatocellular carcinomas: Implications of RB1 and FGF19 aberrations for patient stratification. *Hepatology* (2014).
33. Fujimoto, A. et al. Whole-genome sequencing of liver cancers identifies etiological influences on mutation patterns and recurrent mutations in chromatin regulators. *Nat Genet* **44**, 760-4 (2012).
34. Cleary, S.P. et al. Identification of driver genes in hepatocellular carcinoma by exome sequencing. *Hepatology* **58**, 1693-702 (2013).
35. Shah, S.P. et al. The clonal and mutational evolution spectrum of primary triple-negative breast cancers. *Nature* **486**, 395-9 (2012).
36. Stephens, P.J. et al. The landscape of cancer genes and mutational processes in breast cancer. *Nature* **486**, 400-4 (2012).
37. Banerji, S. et al. Sequence analysis of mutations and translocations across breast cancer subtypes. *Nature* **486**, 405-9 (2012).
38. Comprehensive molecular portraits of human breast tumours. *Nature* **490**, 61-70 (2012).
39. Integrated genomic analyses of ovarian carcinoma. *Nature* **474**, 609-15 (2011).
40. Grasso, C.S. et al. The mutational landscape of lethal castration-resistant prostate cancer. *Nature* **487**, 239-43 (2012).
41. Taylor, B.S. et al. Integrative genomic profiling of human prostate cancer. *Cancer Cell* **18**, 11-22 (2010).
42. Barbieri, C.E. et al. Exome sequencing identifies recurrent SPOP, FOXA1 and MED12 mutations in prostate cancer. *Nat Genetics* **44**, 685-9 (2012).
43. Baca, S.C. et al. Punctuated evolution of prostate cancer genomes. *Cell* **153**, 666-77 (2013).
44. Pugh, T.J. et al. The genetic landscape of high-risk neuroblastoma. *Nat Genet* **45**, 279-84 (2013).
45. Brennan, C.W. et al. The somatic genomic landscape of glioblastoma. *Cell* **155**, 462-77 (2013).
46. Jones, D.T. et al. Dissecting the genomic complexity underlying medulloblastoma. *Nature* **488**, 100-5 (2012).

47. Robinson, G. et al. Novel mutations target distinct subgroups of medulloblastoma. *Nature* **488**, 43-8 (2012).
48. Pugh, T.J. et al. Medulloblastoma exome sequencing uncovers subtype-specific somatic mutations. *Nature* **488**, 106-10 (2012).
49. Sato, Y. et al. Integrated molecular analysis of clear-cell renal cell carcinoma. *Nat Genet* **45**, 860-7 (2013).
50. Guo, G. et al. Frequent mutations of genes encoding ubiquitin-mediated proteolysis pathway components in clear cell renal cell carcinoma. *Nat Genet* **44**, 17-9 (2012).
51. Comprehensive molecular characterization of clear cell renal cell carcinoma. *Nature* **499**, 43-9 (2013).
52. Agrawal, N. et al. Comparative genomic analysis of esophageal adenocarcinoma and squamous cell carcinoma. *Cancer Discov* **2**, 899-905 (2012).
53. Song, Y. et al. Identification of genomic alterations in oesophageal squamous cell cancer. *Nature* **509**, 91-5 (2014).
54. Lin, D.C. et al. Genomic and molecular characterization of esophageal squamous cell carcinoma. *Nat Genet* **46**, 467-73 (2014).
55. Chen, X. et al. Recurrent somatic structural variations contribute to tumorigenesis in pediatric osteosarcoma. *Cell Rep* **7**, 104-12 (2014).
56. Ramos, P. et al. Small cell carcinoma of the ovary, hypercalcemic type, displays frequent inactivating germline and somatic mutations in SMARCA4. *Nat Genet* **46**, 427-9 (2014).
57. Witkowski, L. et al. Germline and somatic SMARCA4 mutations characterize small cell carcinoma of the ovary, hypercalcemic type. *Nat Genet* **46**, 438-43 (2014).
58. Jelinic, P. et al. Recurrent SMARCA4 mutations in small cell carcinoma of the ovary. *Nat Genet* **46**, 424-6 (2014).
59. Lee, R.S. et al. A remarkably simple genome underlies highly malignant pediatric rhabdoid cancers. *J Clin Invest* **122**, 2983-8 (2012).
60. Barretina, J. et al. Subtype-specific genomic alterations define new targets for soft-tissue sarcoma therapy. *Nat Genet* **42**, 715-21 (2010).
61. Francis, J.M. et al. Somatic mutation of CDKN1B in small intestine neuroendocrine tumors. *Nat Genet* **45**, 1483-6 (2013).
62. Kiel, M.J. et al. Integrated genomic sequencing reveals mutational landscape of T-cell prolymphocytic leukemia. *Blood* (2014).
