# Supplementary material
Source: PubMed Central journal article supplement (PMC4355017)

# Box 1

**a**

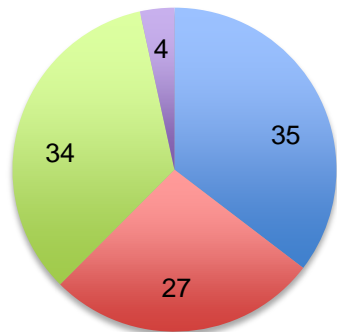

H-Ras

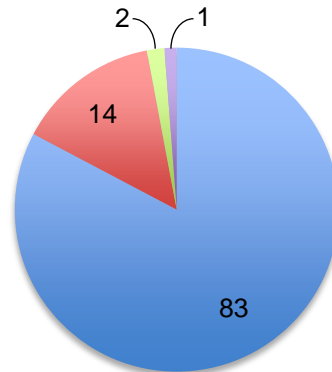

K-Ras

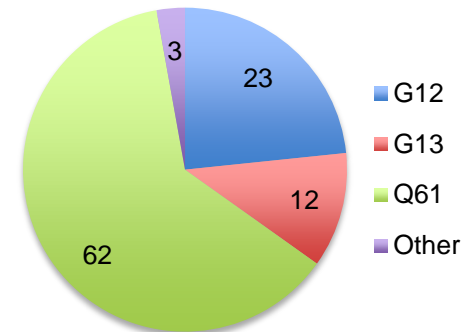

N-Ras

**b**

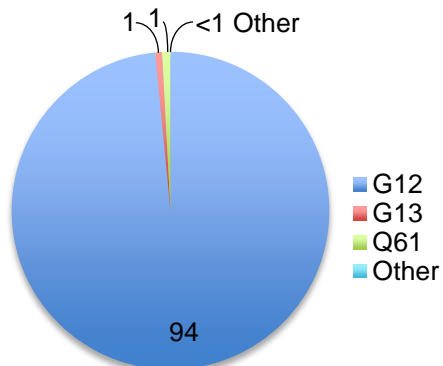

PDAC

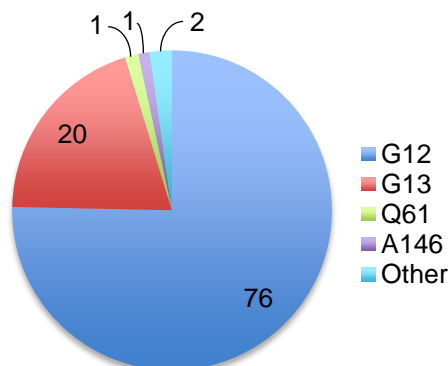

CRC

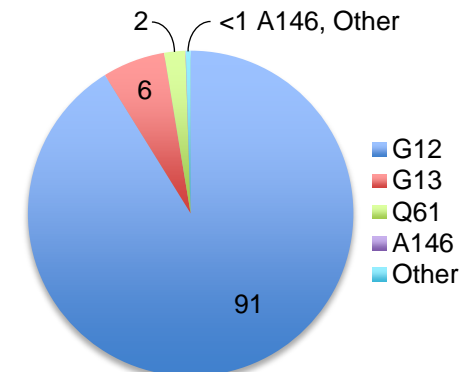

LAC

**c**

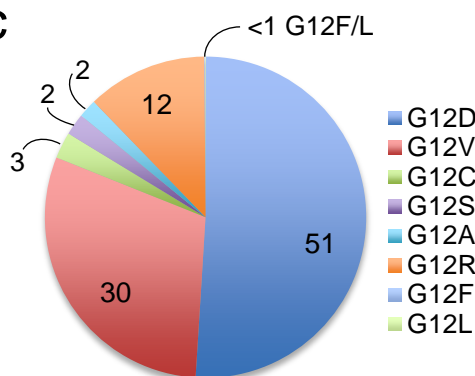

PDAC

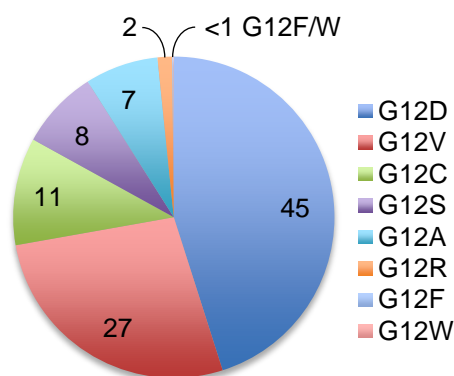

CRC

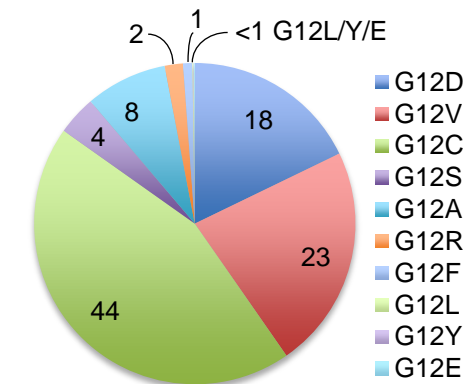

LAC

Supplement: NIHMS648334-supplement-Box_1.pdf [file NIHMS648334-supplement-Box_1.pdf]
